# Supplementary material for: Rhenium(i) trinuclear rings as highly efficient redox photosensitizers for photocatalytic CO2 reduction
Source: Royal Society of Chemistry journal article supplement (doi:10.1039/c6sc01913g), 2016-01-01
Supplement: c6sc01913g1.pdf [file c6sc01913g1.pdf]

## Supporting Information

### **Rhenium(I) Trinuclear Rings as Highly Efficient Redox Photosensitizers for Photocatalytic CO<sub>2</sub> Reduction**

Jana Rohacova and Osamu Ishitani\*

Department of Chemistry, Graduate School of Science and Engineering, Tokyo Institute of Technology,  
2-12-1-NE-1 Ookayama, Meguro-ku, Tokyo, 152-8550, Japan

\*Corresponding author: [ishitani@chem.titech.ac.jp](mailto:ishitani@chem.titech.ac.jp)

#### **Table of Contents**

1. Supporting Scheme (S1)
2. Supporting Equations (S1–S2)
3. Supporting Tables (S1–S5)
4. Supporting Figures (S1–S19)
5. Supporting References

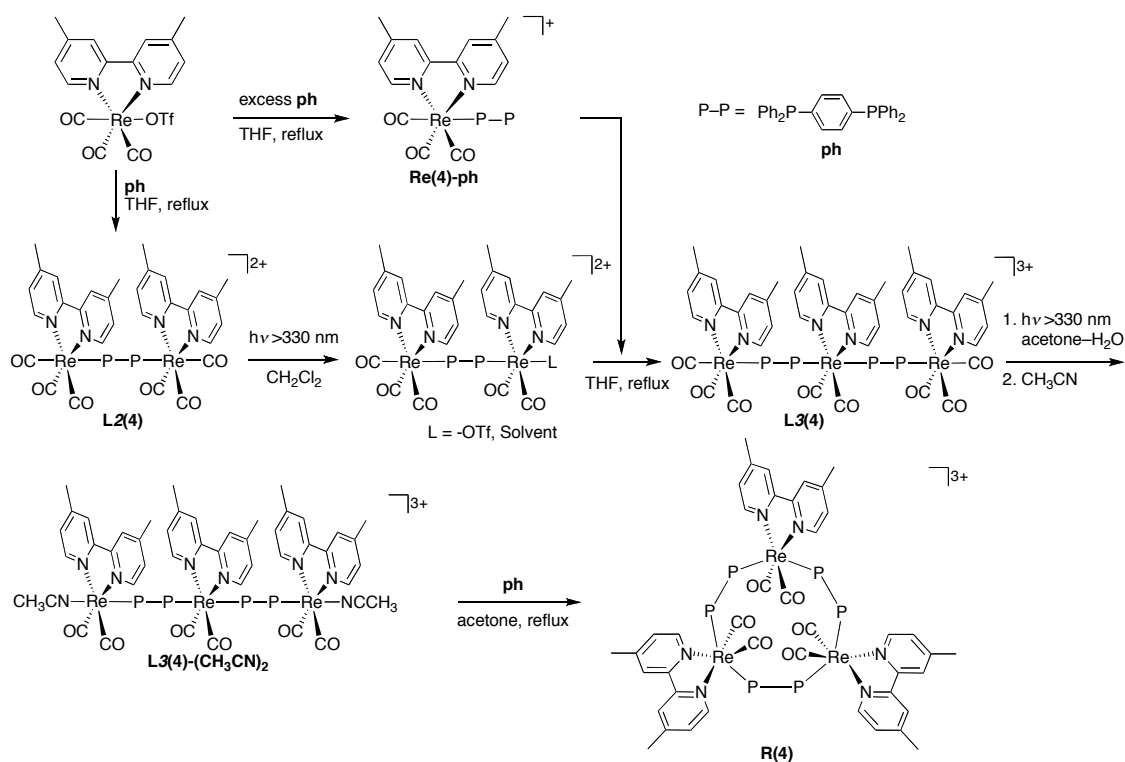

**Scheme S1.** Multistep synthetic approach of **R(4)** using photochemical ligand-substitution reaction.

### Franck–Condon Analysis

The nonvibrational, room temperature emission spectra of **R(X)** were analysed by single-mode Franck–Condon analysis (eqn (S1)).<sup>S1,S2</sup> The photon numbers of the emission spectrum were corrected in a wavenumber scale using the equation  $I(\nu) = I(\lambda) \times \lambda^2$ , *i.e.*,  $I(\nu)$  is the emission intensity at the energy in wavenumber ( $\text{cm}^{-1}$ ) relative to that of the emitted intensity at the maximum ( $0 \rightarrow 0$  transition).  $E_0$  is the energy gap between the zeroth vibrational levels in the ground and excited states,  $\Delta\nu_{1/2}$  is the full width at half-maximum (fwhm) for an individual vibronic line and  $S_M$  is the corresponding electron-vibrational coupling constant or Huang–Rhys factor. The quantum spacing for the averaged medium-frequency vibrational mode,  $\hbar\omega_M$ , was fixed at *ca.* 1300  $\text{cm}^{-1}$  or *ca.* 1700  $\text{cm}^{-1}$  in the fits. The parameter  $\nu_M$  is the vibrational quantum number for the medium frequency acceptor mode, and the summation was carried out over 6 vibrational levels:  $0 \rightarrow 5$ .

The fitted  $E_0$  and  $\Delta\nu_{1/2}$  values may be used to calculate the free energy of the MLCT excited state,  $\Delta G^0_{\text{MLCT}}$ , according to eqn (S2) and are listed in Table S1.

$$I(\nu) = \sum_{\nu_M=0}^{\infty} \left[ \frac{E_0 - \nu_M \hbar \omega_M}{E_0} \right]^4 \left[ \frac{S_M^{\nu_M}}{\nu_M!} \right] \exp \left\{ -4 \ln 2 \left[ \frac{\nu - E_0 + \nu_M \hbar \omega_M}{\Delta \nu_{1/2}} \right]^2 \right\} \quad (\text{S1})$$

$$\Delta G^0_{\text{MLCT}} = E_0 + \frac{(\Delta \nu_{1/2})^2}{16 k_B T \ln 2} \quad (\text{S2})$$

**Table S1.** Energy of the MLCT excited state of **R(X)** at 25 °C

|               | Solvent | $\Delta G^0_{\text{MLCT}} / \text{eV}$ |
|---------------|---------|----------------------------------------|
| <b>R(4)</b>   | DMF     | 2.49                                   |
| <b>R(5)</b>   | DMF     | 2.57                                   |
|               | DMA     | 2.59                                   |
| <b>R(4·5)</b> | DMF     | 2.65                                   |
|               | DMA     | 2.67                                   |
| <b>R(OMe)</b> | DMF     | 2.52                                   |
| <b>R(5)-e</b> | DMF     | 2.50                                   |

**Table S2.** Properties of **R(4·5)** in DMA at 25 °C

|               | $\lambda_{\text{abs}}^a / \text{nm}$<br>( $\epsilon / \text{M}^{-1} \text{cm}^{-1}$ ) | $\lambda_{\text{em}}^b / \text{nm}$ | $\Phi_{\text{em}}^b$ | $\tau_{\text{em}}^c / \mu\text{s}$ | $E_{1/2}^{\text{red } d} / \text{V}$ | $E_{\text{red}}^{*e} / \text{eV}$ | $K_{\text{SV}}^f / \text{M}^{-1}$ | $k_q^g / \text{M}^{-1} \text{s}^{-1}$ | $\eta_q^h$ |
|---------------|---------------------------------------------------------------------------------------|-------------------------------------|----------------------|------------------------------------|--------------------------------------|-----------------------------------|-----------------------------------|---------------------------------------|------------|
| <b>R(4·5)</b> | 385 (12100)                                                                           | 542                                 | 0.53                 | 3.15                               | -1.84                                | 0.83                              | 9.0                               | $2.8 \times 10^6$                     | 0.92       |

<sup>a</sup> MLCT band. <sup>b</sup>  $\lambda_{\text{ex}} = 400 \text{ nm}$ . <sup>c</sup>  $\lambda_{\text{ex}} = 401 \text{ nm}$ . <sup>d</sup> First reduction potential vs. Ag/AgNO<sub>3</sub>, determined from the DPV peak. <sup>e</sup>  $E_{\text{red}}^* \approx \Delta G^0_{\text{MLCT}} + E_{\text{red}}$ . <sup>f</sup> Stern–Volmer constant obtained from quenching experiment of emission by TEOA. <sup>g</sup>  $k_q = K_{\text{SV}}/\tau_{\text{em}}$ . <sup>h</sup> [TEOA] = 1.256 M.

**Table S3.** Absorption and electrochemical properties of the catalysts measured at 25 °C

|                                                  | $\lambda_{\text{abs}}^a / \text{nm}$ ( $\epsilon / \text{M}^{-1} \text{cm}^{-1}$ ) | $\epsilon_{436} (\epsilon_{405}) / \text{M}^{-1} \text{cm}^{-1}$ | $E_p^{\text{red } b} / \text{V}$ |
|--------------------------------------------------|------------------------------------------------------------------------------------|------------------------------------------------------------------|----------------------------------|
| <b>Re-ACN<sup>c</sup></b>                        | 353 (3600)                                                                         | 490 (1650)                                                       | -1.68                            |
| <b>Ru(<i>t</i>Bu)-Cl<sub>2</sub><sup>d</sup></b> | 349 (2000)                                                                         | 50                                                               | -1.57                            |
| <b>Mn(<i>t</i>Bu)-ACN<sup>d</sup></b>            | 389 (3400)                                                                         | 1450                                                             | -1.68                            |

<sup>a</sup> MLCT band. <sup>b</sup> Irreversible wave (the reduction potential vs. Ag/AgNO<sub>3</sub> was determined from the DPV peaks.

<sup>c</sup> Measured in a CO<sub>2</sub>-saturated DMF–TEOA (5 : 1 v/v). <sup>d</sup> Measured in a CO<sub>2</sub>-saturated DMA–TEOA (5 : 1 v/v).

**Table S4.** Fraction of the absorbed light by **R(X)** in regard to **Re-ACN** at different wavelengths (in DMF)

|               | $\lambda / \text{nm}$ ( <b>R(X)</b> : <b>Re-ACN</b> molar ratio) |             |
|---------------|------------------------------------------------------------------|-------------|
|               | 436 (1 : 1)                                                      | 405 (2 : 1) |
| <b>R(4)</b>   | 90%                                                              | 89%         |
| <b>R(5)</b>   | 87%                                                              | 88%         |
| <b>R(4·5)</b> | 85%                                                              | 89%         |
| <b>R(OMe)</b> | 75%                                                              | 88%         |

**Table S5.** Photocatalytic CO<sub>2</sub> reduction using **R(4·5)** photosensitizer with various catalysts<sup>a</sup>

|                                                  | TON   |    |                | $\Phi^b$          |
|--------------------------------------------------|-------|----|----------------|-------------------|
|                                                  | HCOOH | CO | H <sub>2</sub> | HCOOH             |
| <b>Ru(<i>t</i>Bu)-Cl<sub>2</sub><sup>c</sup></b> | 50    | 15 | 15             | 0.45              |
| <b>Mn(<i>t</i>Bu)-ACN<sup>d</sup></b>            | 18    | 9  | traces         | 0.18 <sup>e</sup> |

<sup>a</sup> Photocatalytic CO<sub>2</sub> reduction using an DMA–TEOA mixture (5 : 1 v/v) containing **R(4·5)** (0.05 mM) as a PS and various catalysts (0.05 mM) under 436 nm light irradiation of  $4.2 \times 10^{-9} \text{ einstein s}^{-1}$  intensity. <sup>b</sup>  $\pm 2\%$ ;

<sup>c</sup> TON at 16 h of irradiation. <sup>d</sup> TON at 12 h of irradiation. <sup>e</sup> Taking into account absorption of the Mn-dimer.

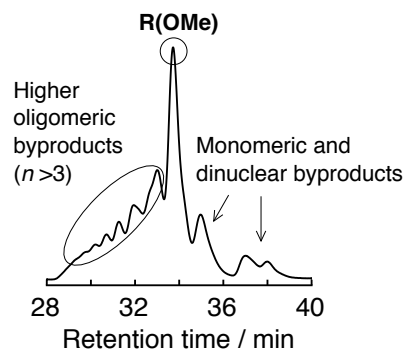

**Fig. S1.** Size exclusion chromatogram of the crude reaction mixture of **R(OMe)** synthesis according to Scheme 1 (main text).

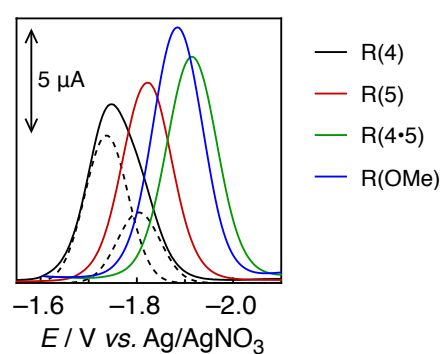

**Fig. S2.** Differential pulse voltammograms of the first reduction of **R(X)** (0.5 mM) in DMF under Ar. The DPV peak of **R(4)** was deconvoluted with two Gaussian functions (---).

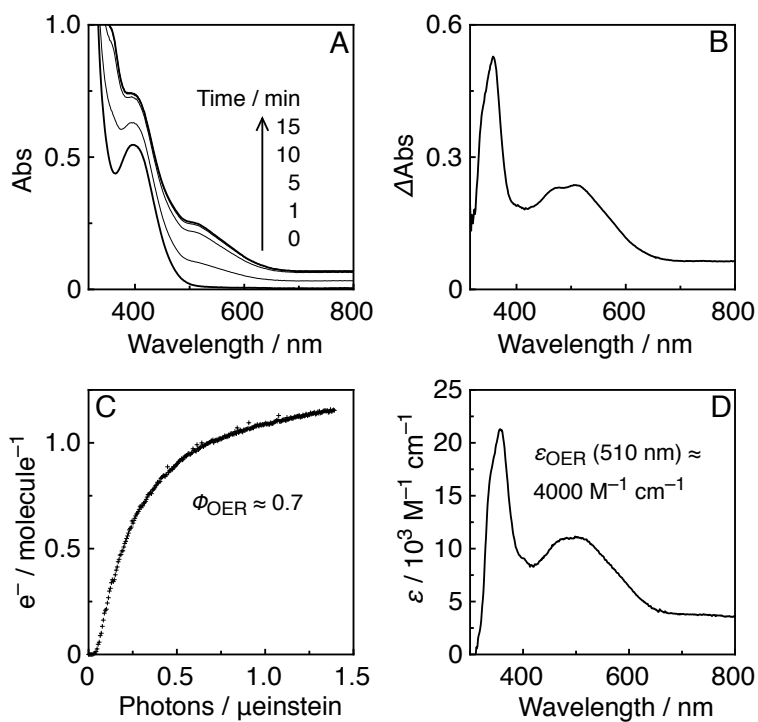

**Fig. S3.** (A) UV-vis absorption spectral changes of an Ar-saturated DMF-TEOA (5 : 1 v/v) solution containing **R(4)** (0.05 mM) under irradiation at  $\lambda_{\text{ex}} = 436 \text{ nm}$  ( $5.6 \times 10^{-9} \text{ einstein s}^{-1}$ ). (B) Differential absorption spectra

derived from the spectrum before irradiation and after 15 min of irradiation. (C) Time course of accumulated electrons in **R(4)** as function of absorbed photons within 10 min of irradiation, compensated for the inner filter effect. (D) Differential absorption spectrum of **R(4)** before and after bulk electrolysis in an Ar-saturated DMF solution at  $-1.95$  V vs. Ag/AgNO<sub>3</sub>.

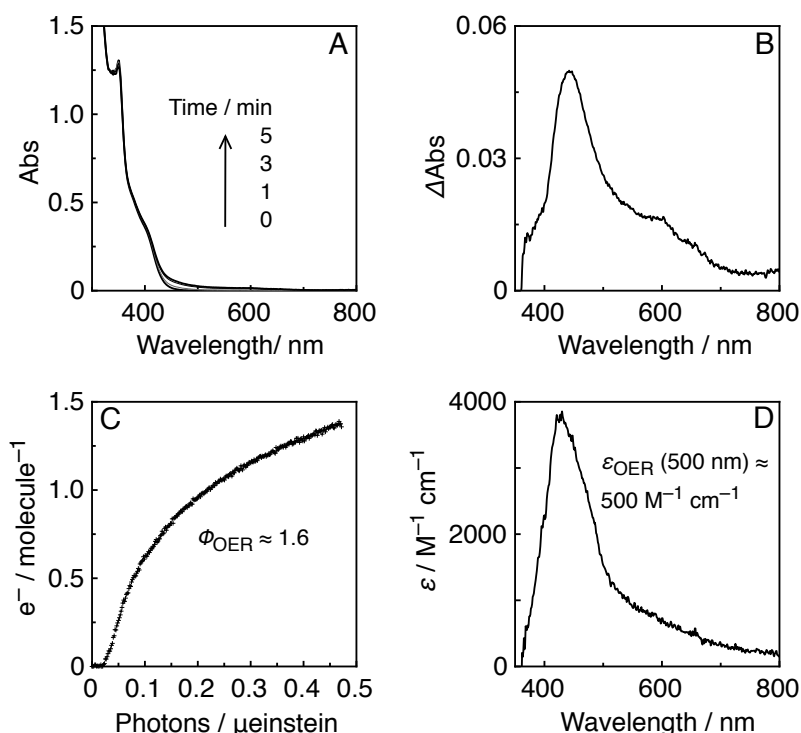

**Fig. S4.** (A) UV-vis absorption spectral changes of an Ar-saturated DMF-TEOA (5 : 1 v/v) solution containing **R(OMe)** (0.05 mM) under irradiation at  $\lambda_{\text{ex}} = 405$  nm ( $1.3 \times 10^{-9}$  einstein  $\text{s}^{-1}$ ). (B) Differential absorption spectra derived from the spectrum before irradiation and after 5 min of irradiation. (C) Time course of accumulated electrons in **R(OMe)** as function of absorbed photons within 10 min of irradiation, compensated for the inner filter effect. (D) Differential absorption spectrum of **R(OMe)** before and after bulk electrolysis in an Ar-saturated DMF solution at  $-2.0$  V vs. Ag/AgNO<sub>3</sub>.

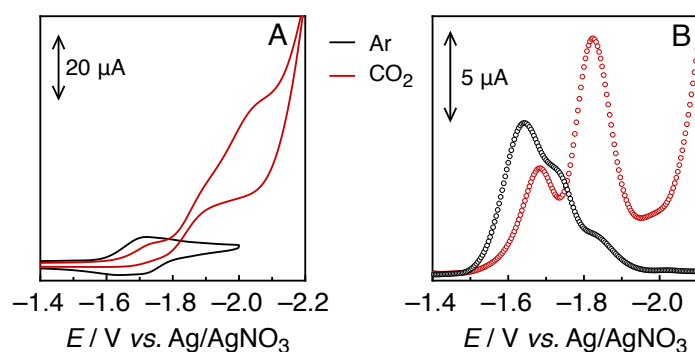

**Fig. S5.** Cyclic voltammogram (A) and corresponding differential pulse voltammogram (B) of **Re-Solv** (0.5 mM) in DMF-TEOA (5 : 1 v/v), where Solv = TEOA under Ar (black) or Solv = CO<sub>2</sub>-TEOA under CO<sub>2</sub> (red) atmosphere, respectively; CV sweep rate = 100 mV  $\text{s}^{-1}$ .

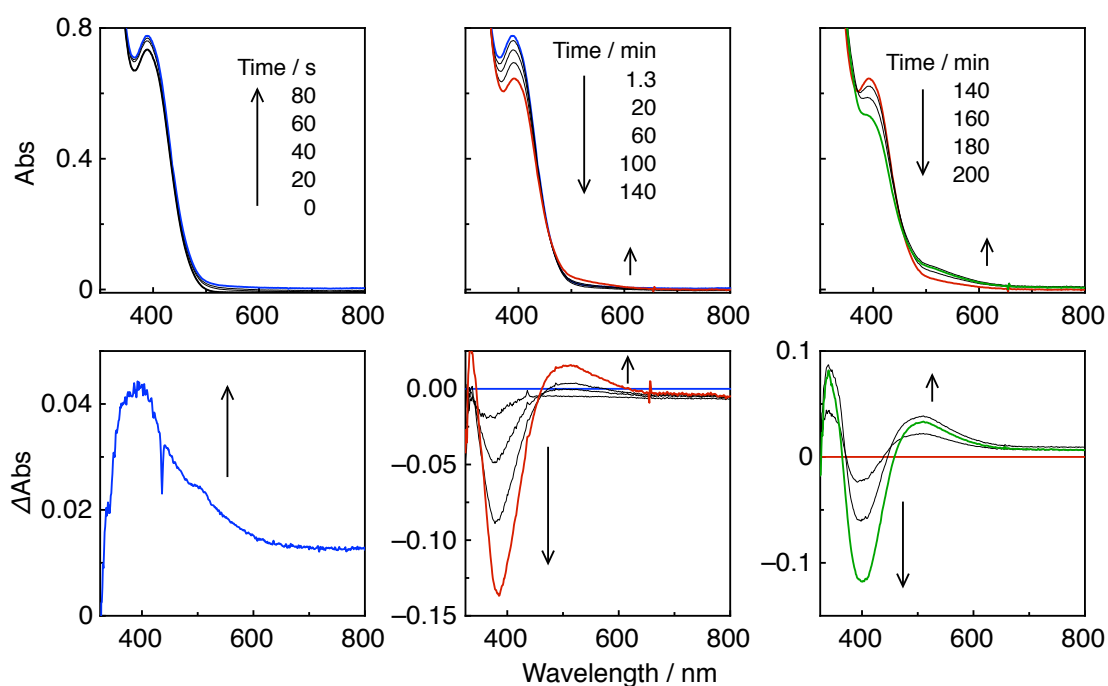

**Fig. S6.** UV-vis (top) and corresponding differential (bottom) absorption spectral changes of a CO<sub>2</sub>-saturated DMF-TEOA (5 : 1 v/v) solution containing **R(4)** (0.05 mM) as a PS and **Re-ACN** (0.05 mM) as the catalyst, under irradiation at  $\lambda_{\text{ex}} = 436 \text{ nm}$  ( $5.7 \times 10^{-9} \text{ einstein s}^{-1}$ ) in the initial stage (left) and over 3.5 h of irradiation (middle and right).

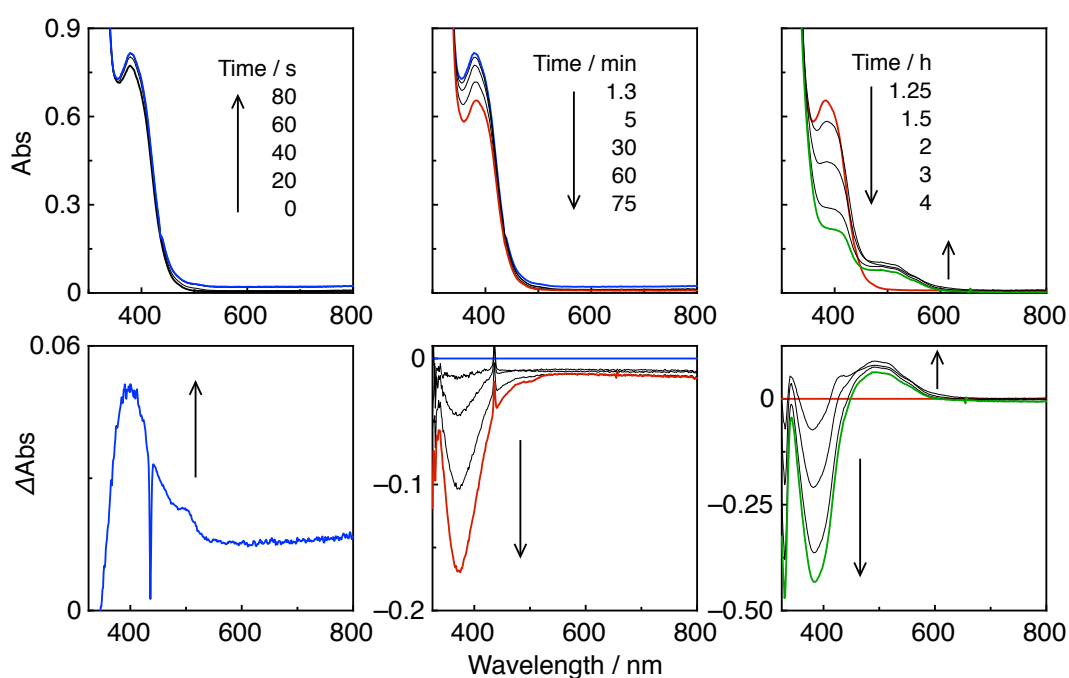

**Fig. S7.** UV-vis (top) and corresponding differential (bottom) absorption spectral changes of a CO<sub>2</sub>-saturated DMF-TEOA (5 : 1 v/v) solution containing **R(4.5)** (0.05 mM) as a PS and **Re-ACN** (0.05 mM) as the catalyst, under irradiation at  $\lambda_{\text{ex}} = 436 \text{ nm}$  ( $5.7 \times 10^{-9} \text{ einstein s}^{-1}$ ) in the initial stage (left) and over 4 h of irradiation (middle and right).

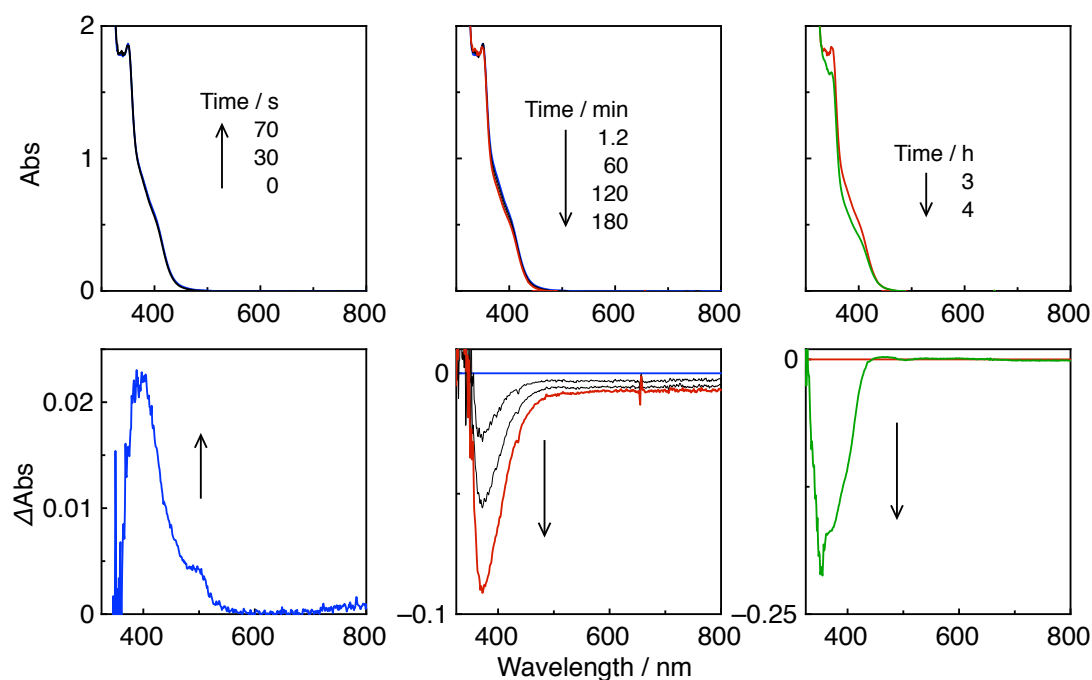

**Fig. S8.** UV-vis (top) and corresponding differential (bottom) absorption spectral changes of a CO<sub>2</sub>-saturated DMF-TEOA (5 : 1 v/v) solution containing **R(OMe)** (0.05 mM) as a PS and **Re-ACN** (0.05 mM) as the catalyst, under irradiation at  $\lambda_{\text{ex}} = 436 \text{ nm}$  ( $5.7 \times 10^{-9} \text{ einstein s}^{-1}$ ) in the initial stage (left) and over 4 h of irradiation (middle and right).

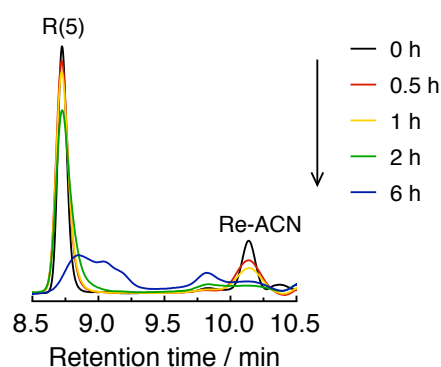

**Fig. S9.** UPLC chart of the **R(5)/Re-ACN** photocatalytic system ;  $\lambda_{\text{det}} = 350 \text{ nm}$ .

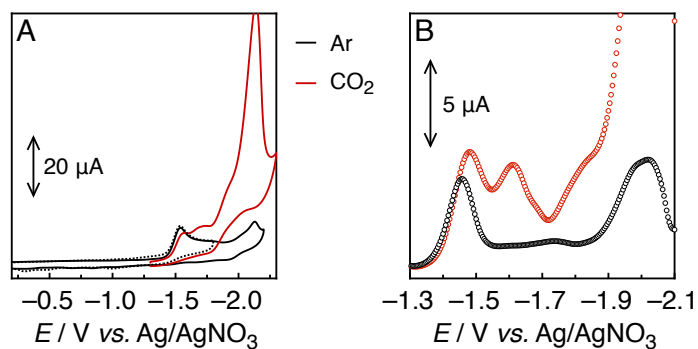

**Fig. S10.** Cyclic voltammogram (A) and corresponding differential pulse voltammogram (B) of **Ru(*t*Bu)-Cl<sub>2</sub>** (0.5 mM) in DMA-TEOA (5 : 1 v/v) under Ar (black) or CO<sub>2</sub> (red) atmosphere; CV sweep rate =  $100 \text{ mV s}^{-1}$ .

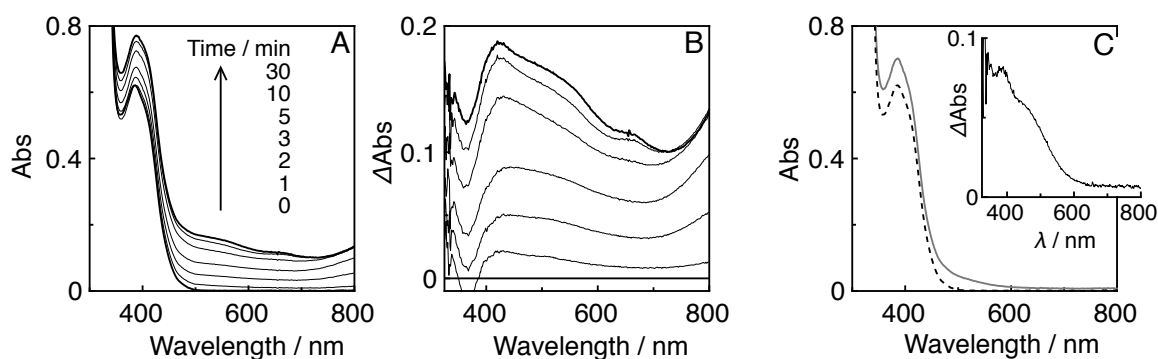

**Fig. S11.** UV-vis (A) and corresponding differential (B) absorption spectral changes of an Ar-saturated DMA-TEOA (5 : 1 v/v) solution containing **R(5)** (0.05 mM) and **Ru(*t*Bu)-Cl<sub>2</sub>** (0.05 mM), over 1 h irradiation at  $\lambda_{\text{ex}} = 436 \text{ nm}$  ( $4.2 \times 10^{-9} \text{ einstein s}^{-1}$ ). (C) UV-vis spectra of the solution before irradiation (black dashed), and that of the irradiated solution after exposure to the air (gray solid); Inset: Corresponding differential UV-vis spectrum.

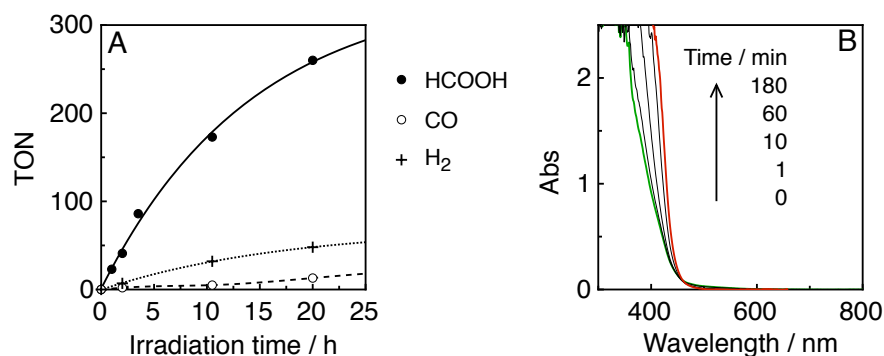

**Fig. S12.** (A) Products-time course of photocatalytic CO<sub>2</sub> reduction using **R(5)** (0.05 mM) as a PS, **Ru(*t*Bu)-Cl<sub>2</sub>** (0.05 mM) as the catalysts and BI(OH)H (0.03M) as a sacrificial electron donor in DMA-TEOA (5 : 1 v/v) under 436-nm light irradiation of  $4.2 \times 10^{-9} \text{ einstein s}^{-1}$  intensity. (B) UV-vis absorption spectral changes of the irradiated solution.

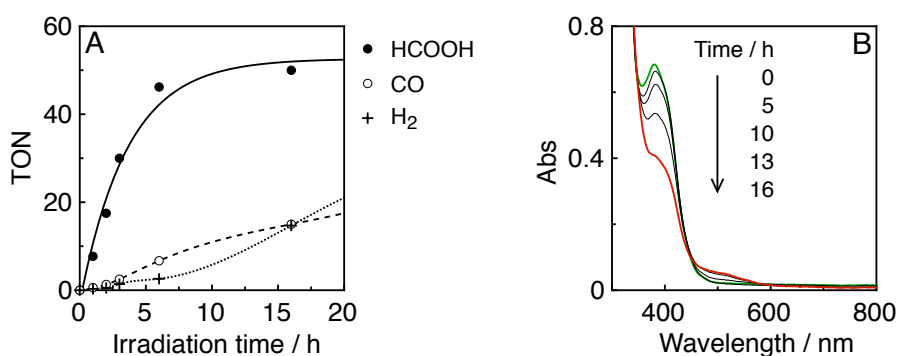

**Fig. S13.** (A) Products-time course of photocatalytic CO<sub>2</sub> reduction using **R(4·5)** (0.05 mM) as a PS and **Ru(*t*Bu)-Cl<sub>2</sub>** (0.05 mM) as the catalysts in DMA-TEOA (5 : 1 v/v) under 436-nm light irradiation of  $4.2 \times 10^{-9} \text{ einstein s}^{-1}$  intensity. (B) UV-vis absorption spectral changes of the irradiated solution.

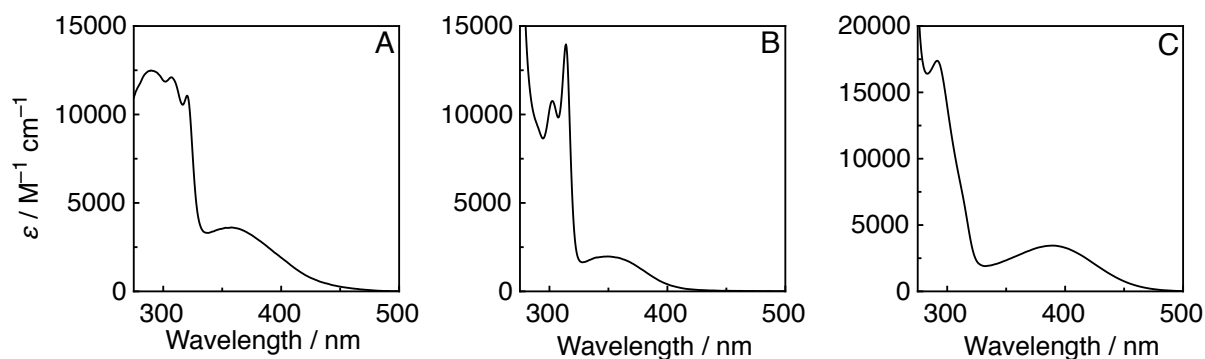

**Fig. S14.** (A) UV-vis absorption spectrum of **Re-ACN** (A) in a CO<sub>2</sub>-saturated DMF-TEOA (5 : 1 v/v), **Ru(tBu)-Cl<sub>2</sub>** (B) and **Mn(tBu)-ACN** (C) both in a CO<sub>2</sub>-saturated DMA-TEOA (5 : 1 v/v).

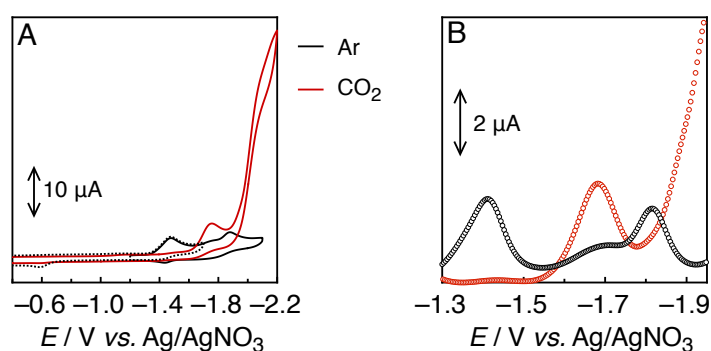

**Fig. S15.** Cyclic voltammogram (A) and corresponding differential pulse voltammogram (B) of **Mn(tBu)-Solv** (0.5 mM) in DMA-TEOA (5 : 1 v/v), where Solv = TEOA under Ar (black) or Solv = CO<sub>2</sub>-TEOA under CO<sub>2</sub> (red) atmosphere, respectively; CV sweep rate = 100 mV s<sup>-1</sup>.

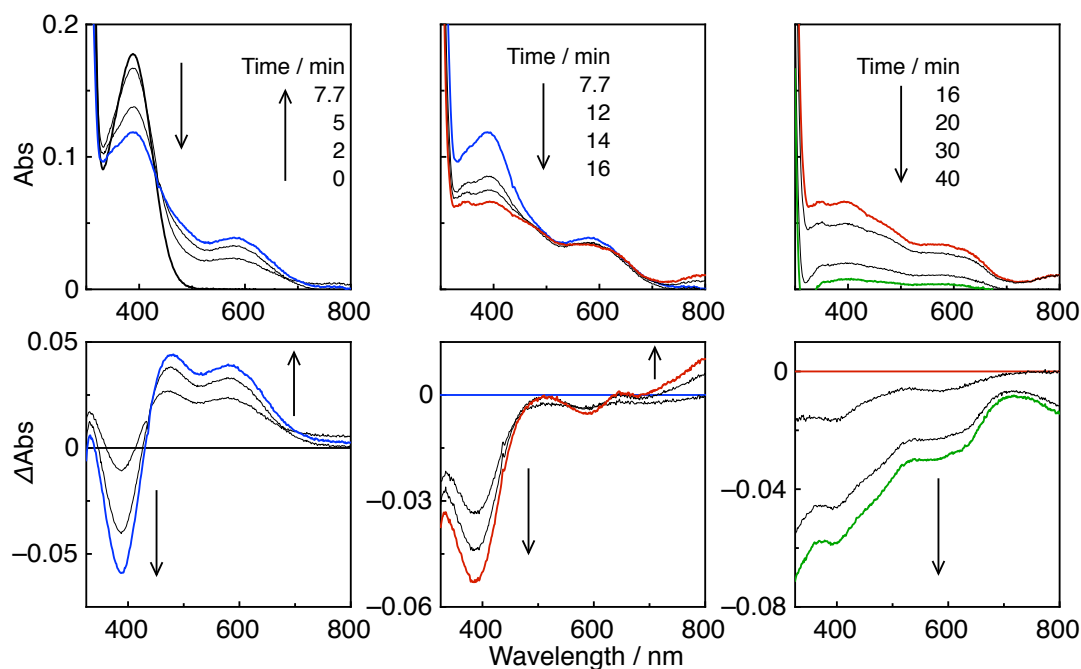

**Fig. S16.** UV-vis (top) and corresponding differential (bottom) absorption spectral changes of a CO<sub>2</sub>-saturated DMA-TEOA (5 : 1 v/v) solution containing **Mn(tBu)-ACN** (0.05 mM) as photocatalyst under irradiation at  $\lambda_{\text{ex}} = 436 \text{ nm}$  over 1 h irradiation.

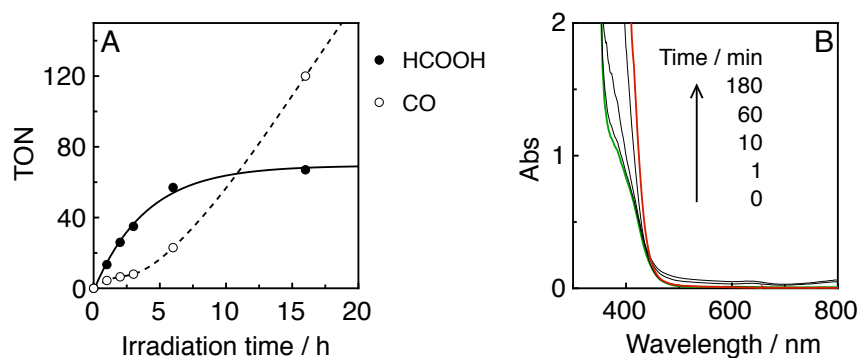

**Fig. S17.** (A) Products-time course of photocatalytic  $\text{CO}_2$  reduction using **R(5)** (0.05 mM) as a PS, **Mn(*t*Bu)-ACN** (0.05 mM) as the catalysts and BI(OH)H (0.03M) as a sacrificial electron donor in DMA-TEOA (5 : 1 v/v) under 436-nm light irradiation of  $5.3 \times 10^{-9}$  einstein  $\text{s}^{-1}$  intensity. (B) UV-vis absorption spectral changes of the irradiated solution.

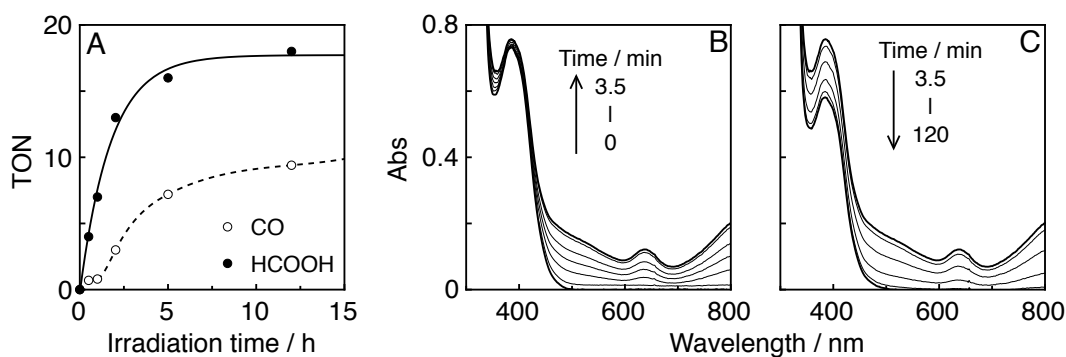

**Fig. S18.** (A) Time course of product formation using **R(4·5)** (0.05 mM) as a PS and **Mn(*t*Bu)-ACN** (0.05 mM) as the catalysts in DMA-TEOA (5 : 1 v/v) under 436 nm-light irradiation of  $4.2 \times 10^{-9}$  einstein  $\text{s}^{-1}$  intensity. UV-vis absorption spectral changes of the photocatalytic reaction in the initial stage (B) and over 2 h irradiation (C).

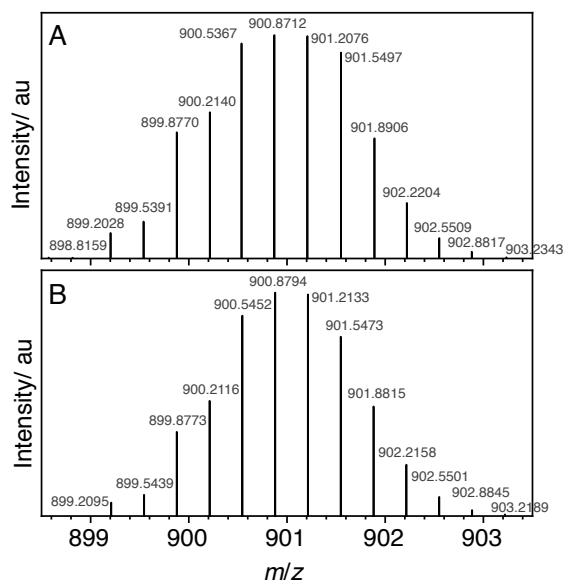

**Fig. S19.** Peaks corresponding to  $[\text{M} - 3\text{PF}_6]^{3+}$  in the ESI-TOFMS spectrum of **R(4·5)** (A) and the calculated isotope distribution pattern (B).

### Supporting References

- S1 J. V. Caspar, T. D. Westmoreland, G. H. Allen, P. G. Bradley, T. J. Meyer and W. H. Woodruff, *J. Am. Chem. Soc.*, 1984, **106**, 3492–3500.
- S2 L. A. Worl, R. Duesing, P. Chen, L. Della Ciana and T. J. Meyer, *J. Chem. Soc., Dalton Trans.*, 1991, 849–858.
